# Supplementary material
Source: PubMed Central journal article supplement (PMC2409040)
Supplement: pp.108.118745_1.pdf [file pp.108.118745_1.pdf]

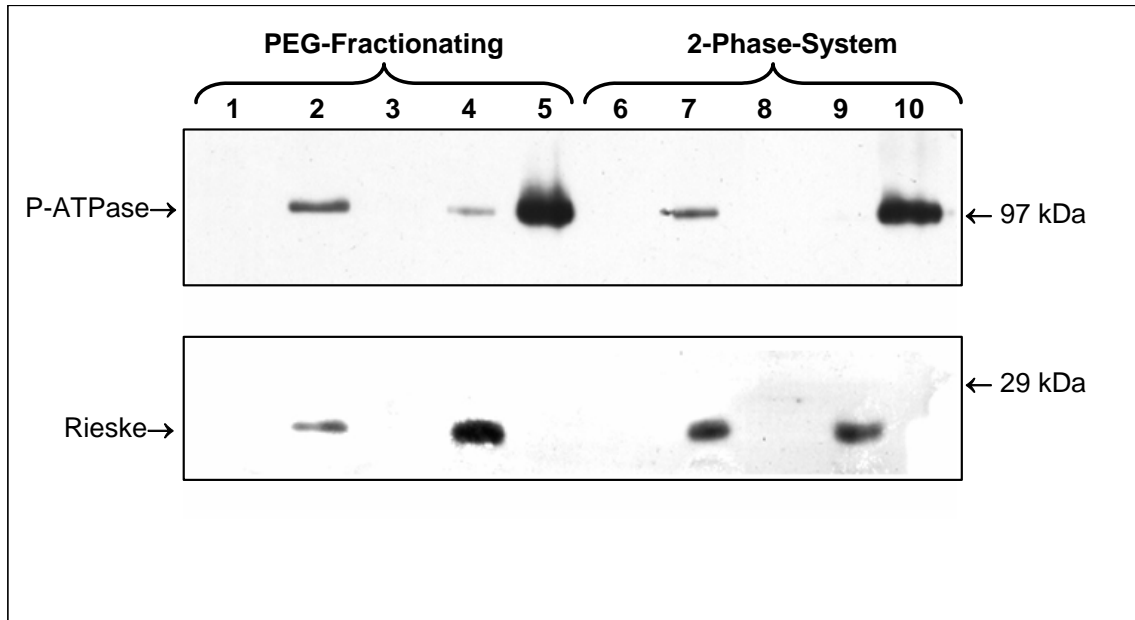

Fig. S1. Comparison of two methods of plasma membrane preparation. Immunoblots of protein fractions prepared by PEG-fractionation according to Thein and Michalke (1988) or by dextran-PEG 2-phase system according to Larsson et al. (1994). Homogenate (1, 6), microsome fraction (2, 7), soluble protein fraction (3, 8), intracellular membrane vesicles (4, 9), plasma membrane fraction (5, 10). Samples containing 20  $\mu$ g protein were loaded on the gel. Immunoblots were decorated with antibodies directed against P-ATPase and Rieske protein. Marker positions [kDa] are given on the right side.
