# Supplementary material
Source: PubMed Central journal article supplement (PMC2409040)
Supplement: pp.108.118745_3.pdf [file pp.108.118745_3.pdf]

## Appendix

Formulas and extinction coefficients used for the determination of NAD(P)H oxidation and quinone reduction (hydroquinone accumulation) in NADPH/quinone mixtures. Suitable wavelengths pairs ( $\lambda_1, \lambda_2$ ) were selected from absorbance (A) spectra of the quinones (100  $\mu\text{M}$ ) dissolved in 20 mM HEPES, pH 7.5, with 0.1% DMSO (0.1% ethanol + 2% Tween 20 in the case of vitamins  $k_1$  and  $k_2$ ) before and after exhaustive reduction with solid  $\text{NaBH}_4$ . NAD(P)H was oxidized with catalytic amounts of methoxyphenazine methosulfate. Disregarding possible impurities of the commercially obtained quinones, differential (ox  $\rightarrow$  red) extinction coefficients ( $\epsilon_{\lambda_1}, \epsilon_{\lambda_2}$ ) were calculated and used for the estimation of concentration changes ( $\Delta c_a, \Delta c_b$ , measured in a 1-cm cuvette) in a mixture of components a, b according to the general formulas:

$$\Delta c_a = \frac{\epsilon_{\lambda_2}^b}{x} \Delta A_1 - \frac{\epsilon_{\lambda_1}^b}{x} \Delta A_2, \text{ and } \Delta c_b = \frac{\epsilon_{\lambda_1}^a}{x} \Delta A_2 - \frac{\epsilon_{\lambda_2}^a}{x} \Delta A_1,$$

whereby  $\Delta A_1$  = measured absorbance change at  $\lambda_1$ ,  $\Delta A_2$  = measured absorbance change at  $\lambda_2$  and  $x = \epsilon_{\lambda_2}^b \cdot \epsilon_{\lambda_1}^a - \epsilon_{\lambda_1}^b \cdot \epsilon_{\lambda_2}^a$ .  $\Delta c_b, \epsilon_{\lambda_1}^b, \epsilon_{\lambda_2}^b$  refer to  $\text{NAD(P)H} \rightarrow \text{NAD(P)}^+$ .

These formulas can be derived from the principle that the concentrations of the two pigments a, b in a mixture of these pigments can be calculated from the absorbance spectrum at two wavelengths ( $\lambda_1, \lambda_2$ ) demonstrating large differences in  $\epsilon_\lambda$ . From  $A_1 = \epsilon_{\lambda_1}^a \cdot c_a + \epsilon_{\lambda_1}^b \cdot c_b$ , and  $A_2 = \epsilon_{\lambda_2}^b \cdot c_b + \epsilon_{\lambda_2}^a \cdot c_a$ , the equations defining  $c_a$  and  $c_b$  can be derived by mutual substitution and rearrangement. This procedure has been exemplified in detail for the estimation of chlorophylls *a* and *b* in plant extracts (Strain HH, Svec WA, 1966).

| Component a<br>(ox $\rightarrow$ red) | $\lambda_1$<br>[nm] | $\lambda_2$<br>[nm] | $\epsilon_{\lambda_1}^a$<br>[mM <sup>-1</sup> cm <sup>-1</sup> ] | $\epsilon_{\lambda_2}^a$<br>[mM <sup>-1</sup> cm <sup>-1</sup> ] | $\epsilon_{\lambda_1}^b$<br>[mM <sup>-1</sup> cm <sup>-1</sup> ] | $\epsilon_{\lambda_2}^b$<br>[mM <sup>-1</sup> cm <sup>-1</sup> ] |
|---------------------------------------|---------------------|---------------------|------------------------------------------------------------------|------------------------------------------------------------------|------------------------------------------------------------------|------------------------------------------------------------------|
| NQ                                    | 290                 | 340                 | 2.23                                                             | -0.35                                                            | -0.92                                                            | -6.21                                                            |
| 2-Methyl-NQ                           | 290                 | 340                 | 2.18                                                             | -0.085                                                           | -0.92                                                            | -6.21                                                            |
| 5-Hydroxy-NQ                          | 366                 | 425                 | -0.98                                                            | -3.15                                                            | -3.38                                                            | 0.00                                                             |
| 5-Hydroxy,2-methyl-NQ                 | 420                 | 366                 | -3.79                                                            | -1.41                                                            | 0.00                                                             | -3.38                                                            |
| 2-Hydroxy-NQ                          | 450                 | 366                 | -2.92                                                            | 1.52                                                             | 0.00                                                             | -3.38                                                            |
| 2-Methoxy-NQ                          | 282.3               | 340                 | -14.1                                                            | 0.86                                                             | 0.00                                                             | -6.21                                                            |
| 2,3-Dimethoxy-NQ                      | 282.3               | 340                 | -8.16                                                            | -0.16                                                            | 0.00                                                             | -6.21                                                            |

|                        |       |     |       |        |       |       |
|------------------------|-------|-----|-------|--------|-------|-------|
| Vitamin k <sub>1</sub> | 282.3 | 366 | -1.24 | -0.32  | 0.00  | -3.38 |
| Vitamin k <sub>2</sub> | 282.3 | 366 | -1.24 | -0.32  | 0.00  | -3.38 |
| BQ                     | 290   | 340 | 1.41  | -0.008 | -0.92 | -6.21 |
| 2-Methyl-BQ            | 282.3 | 340 | 2.61  | -0.38  | 0.00  | -6.21 |
| 2,5-Dimethyl-BQ        | 282.3 | 340 | 3.11  | -0.075 | 0.00  | -6.21 |
| 2,6-Dimethyl-BQ        | 282.3 | 340 | 2.54  | -0.26  | 0.00  | -6.21 |
| Ubiquinone 0           | 290   | 340 | 0.70  | -0.25  | -0.92 | -6.21 |
| Tetramethyl-BQ         | 290   | 340 | 1.22  | -0.17  | -0.92 | -6.21 |
| 2,6-Dimethoxy-BQ       | 282.3 | 340 | -11.2 | -0.31  | 0.00  | -6.21 |
| 2,5-Dihydroxy-BQ       | 290   | 366 | 3.14  | -0.31  | -0.92 | -3.38 |
| Tetrahydroxy-BQ        | 483   | 340 | -16.9 | -0.22  | 0.00  | -6.21 |

---

(NQ=1,4-naphthoquinone, BQ=1,4-benzoquinone)
